# Supplementary material
Source: publisher figshare collection journal article supplement (https://acs.figshare.com/ndownloader/files/4537930)
Supplement: Supplementary file 1 [file 4537930]

# Supporting Information

## Nearly Uniform Decaosmium Clusters Supported on MgO: Characterization by X-ray Absorption Spectroscopy and Scanning Transmission Electron Microscopy

**Apoorva Kulkarni,<sup>†</sup> Shareghe Mehraeen,<sup>†</sup> Bryan W. Reed,<sup>‡</sup> Norihiko L.**

**Okamoto,<sup>†</sup> Nigel D. Browning,<sup>†,‡</sup> and Bruce C. Gates\*,<sup>†</sup>**

Department of Chemical Engineering and Materials Science, University of California,  
One Shields Avenue, Davis, California, 95616, and Condensed Matter and Materials  
Division, Lawrence Livermore National Laboratory, Livermore, California 94550

**Table SI1:** Reference Compounds used in EXAFS Contributions

| Compound                           | Absorber-backscatterer pair | $R(\text{\AA})$ | Type of Reference        |
|------------------------------------|-----------------------------|-----------------|--------------------------|
| Os metal                           | Os–Os                       | 2.62            | Theoretical <sup>a</sup> |
| Os <sub>3</sub> (CO) <sub>12</sub> | Os–C                        | 1.95            | Experimental             |
| Os <sub>3</sub> (CO) <sub>12</sub> | Os–O*                       | 3.09            | Experimental             |
| ReO <sub>2</sub>                   | Os–O <sub>support</sub>     | 2.10            | Theoretical <sup>a</sup> |

<sup>a</sup>Theoretical references were generated by FEFF7.

**Table SI2:** Structural Parameters Corresponding to Structural Model II for EXAFS Data Characterizing the MgO Supported Osmium Species formed by reductive carbonylation of Os<sub>3</sub>(CO)<sub>12</sub> on MgO at 548 K

| Model    | Absorber–backscatterer pair | $N$           | $R(\text{\AA})$ | $10^3 \times \Delta\sigma^2(\text{\AA}^2)$ | $\Delta E_0(\text{eV})$ | $\epsilon_v^2$ |
|----------|-----------------------------|---------------|-----------------|--------------------------------------------|-------------------------|----------------|
| Model II | Os–Os                       | $4.5 \pm 0.9$ | $2.89 \pm 0.02$ | $8.4 \pm 2.2$                              | $-1.23 \pm 1.9$         | 4.9            |
|          | Os–C                        | $3.1 \pm 0.5$ | $2.60 \pm 0.03$ | $3.3 \pm 1.8$                              | $3.28 \pm 2.3$          |                |
|          | Os–O*                       | $2.1 \pm 0.9$ | $3.01 \pm 0.02$ | $5.5 \pm 3.6$                              | $4.56 \pm 6.7$          |                |
|          | Os–Mg                       | $1.0 \pm 0.3$ | $2.65 \pm 0.01$ | $-1.1 \pm 2.2$                             | $-18.99 \pm 8.9$        |                |

<sup>a</sup>The errors given in the table correspond to the precisions of the parameters. Notation:  $N$ , coordination number;  $R$ , interatomic distance;  $\Delta\sigma^2$ , Debye-Waller parameter;  $\Delta E_0$ , inner potential correction; the estimated accuracies of the parameter are as follows:  $N$ ,  $\pm 20\%$ ;  $R$ ,  $\pm 2\%$   $\text{\AA}$ ;  $\Delta\sigma^2$ ,  $\pm 20\%$ ;  $\Delta E_0$ ,  $\pm 20\%$ .

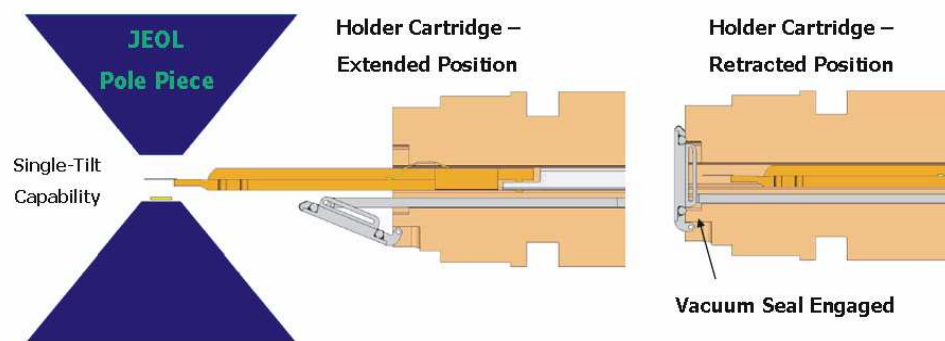

**Figure SI 1:** Fischione vacuum-transfer-holder (Model 2020).

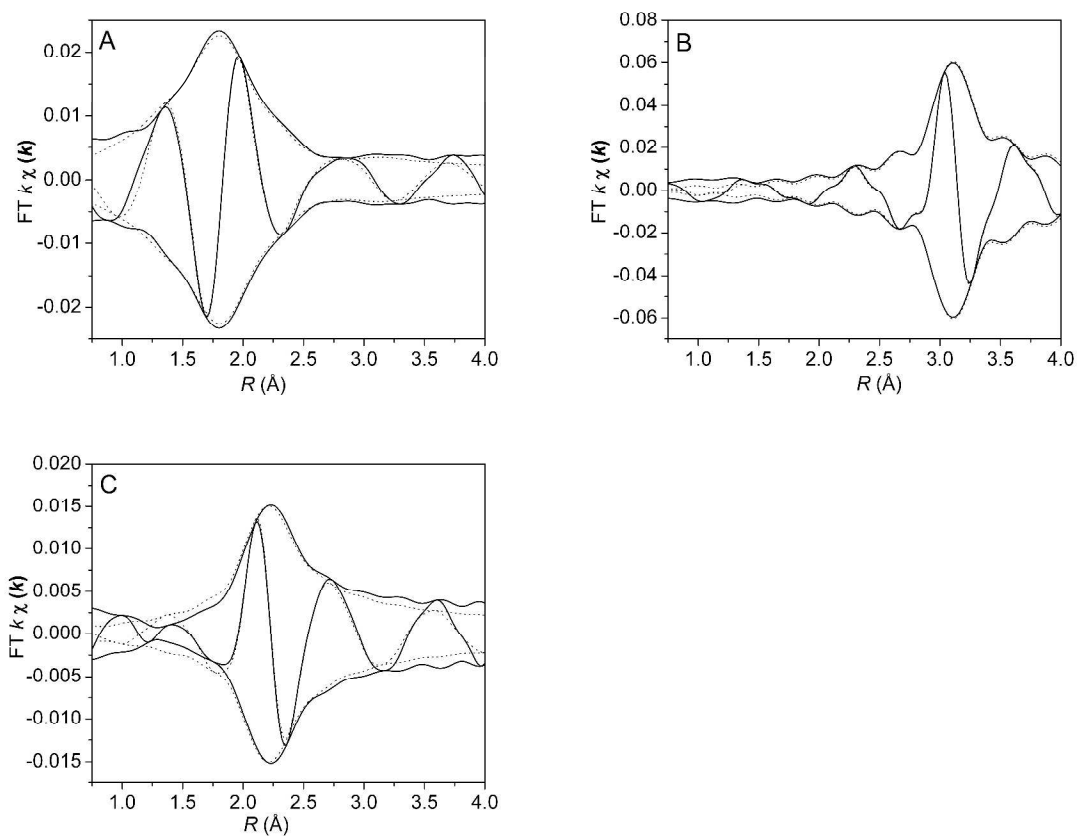

**Figure SI 2:** EXAFS data (Model I) characterizing species formed by reductive carbonylation of  $\text{Os}_3(\text{CO})_{12}$  on MgO at 548 K: (A)  $k^l$ -weighted, phase corrected, imaginary part and magnitude of the Fourier transform of data (solid line) and calculated contributions (dotted line) of Os–C shell; (B)  $k^l$ -weighted, phase corrected, imaginary part and magnitude of the Fourier transform of data (solid line) and calculated contributions (dotted line) of Os–O\* shell; (C)  $k^l$ -weighted, phase corrected, imaginary part and magnitude of the Fourier transform of data (solid line) and calculated contributions (dotted line) of Os–O<sub>support</sub> shell.

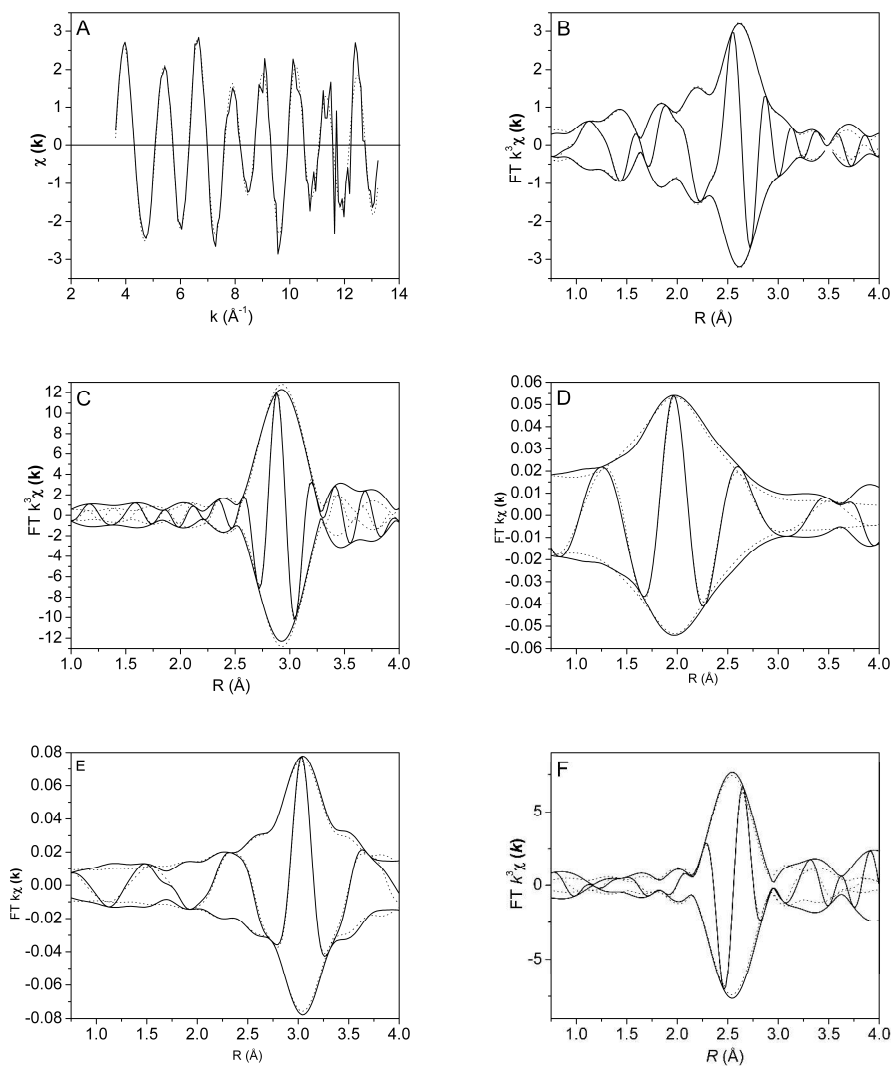

**Figure SI 3:** EXAFS data (Model II) characterizing species formed from reductive carbonylation of  $\text{Os}_3(\text{CO})_{12}$  on MgO at 548 K: (A)  $k^3$ -weighted EXAFS function,  $k^3(\chi)$  (solid line) and sum of the calculated contributions (dotted line); (B)  $k^3$ -weighted imaginary part and magnitude of the Fourier transform of data (solid line) and sum of the calculated contributions (dotted line); (C)  $k^3$ -weighted, phase and amplitude corrected, imaginary part and magnitude of the Fourier transform of data (solid line) and calculated contributions (dotted line) of Os–Os shell; (D)  $k^1$ -weighted, phase corrected, imaginary part and magnitude of the Fourier transform of data (solid line) and calculated contributions (dotted line) of Os–C shell; (E)  $k^1$ -weighted, phase corrected, imaginary part and magnitude of the Fourier transform of data (solid line) and calculated contributions (dotted line) of Os–O\* shell; (F)  $k^3$ -weighted, phase and amplitude corrected, imaginary part and magnitude of the Fourier transform of data (solid line) and calculated contributions (dotted line) of Os–Mg shell.

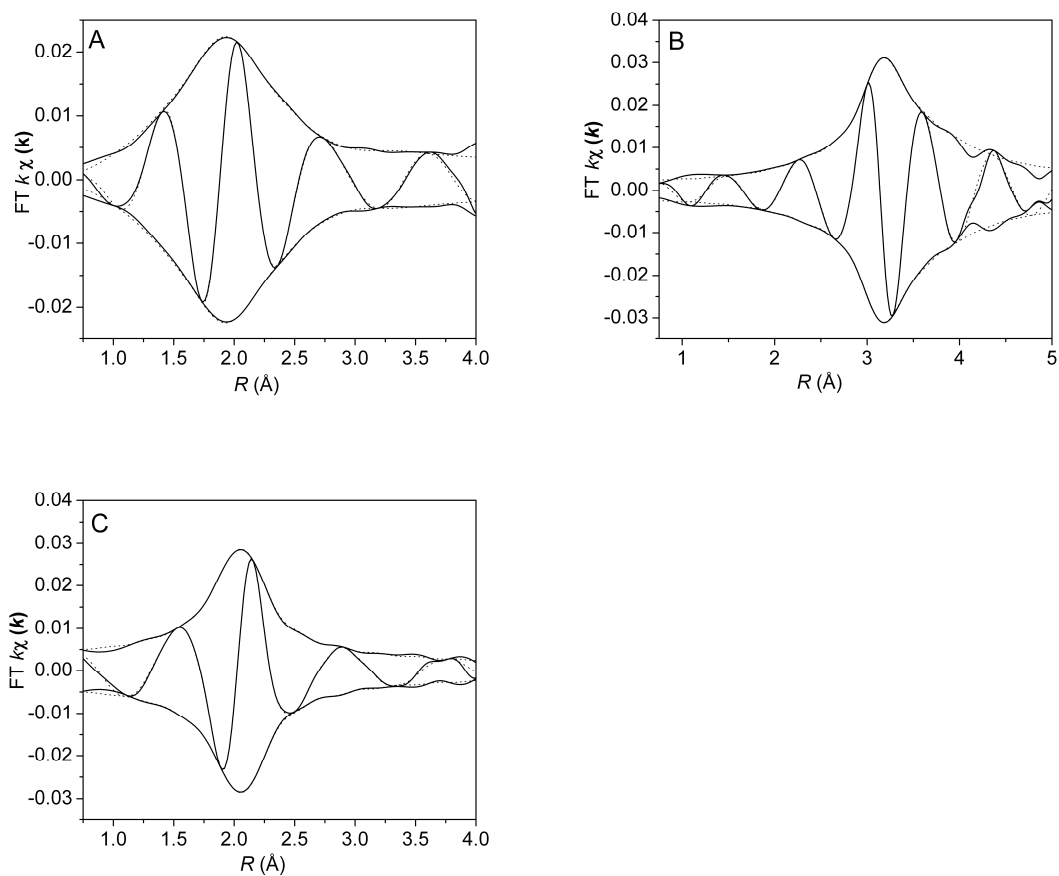

**Figure SI 4:** EXAFS data (Model III) characterizing species formed by reductive carbonylation of  $\text{Os}_3(\text{CO})_{12}$  on MgO at 548 K: (A)  $k^l$ -weighted, phase corrected, imaginary part and magnitude of the Fourier transform of data (solid line) and calculated contributions (dotted line) of Os–C shell; (B)  $k^l$ -weighted, phase corrected, imaginary part and magnitude of the Fourier transform of data (solid line) and calculated contributions (dotted line) of Os–O\* shell; (C)  $k^l$ -weighted, phase corrected, imaginary part and magnitude of the Fourier transform of data (solid line) and calculated contributions (dotted line) of Os–O<sub>support</sub> shell.

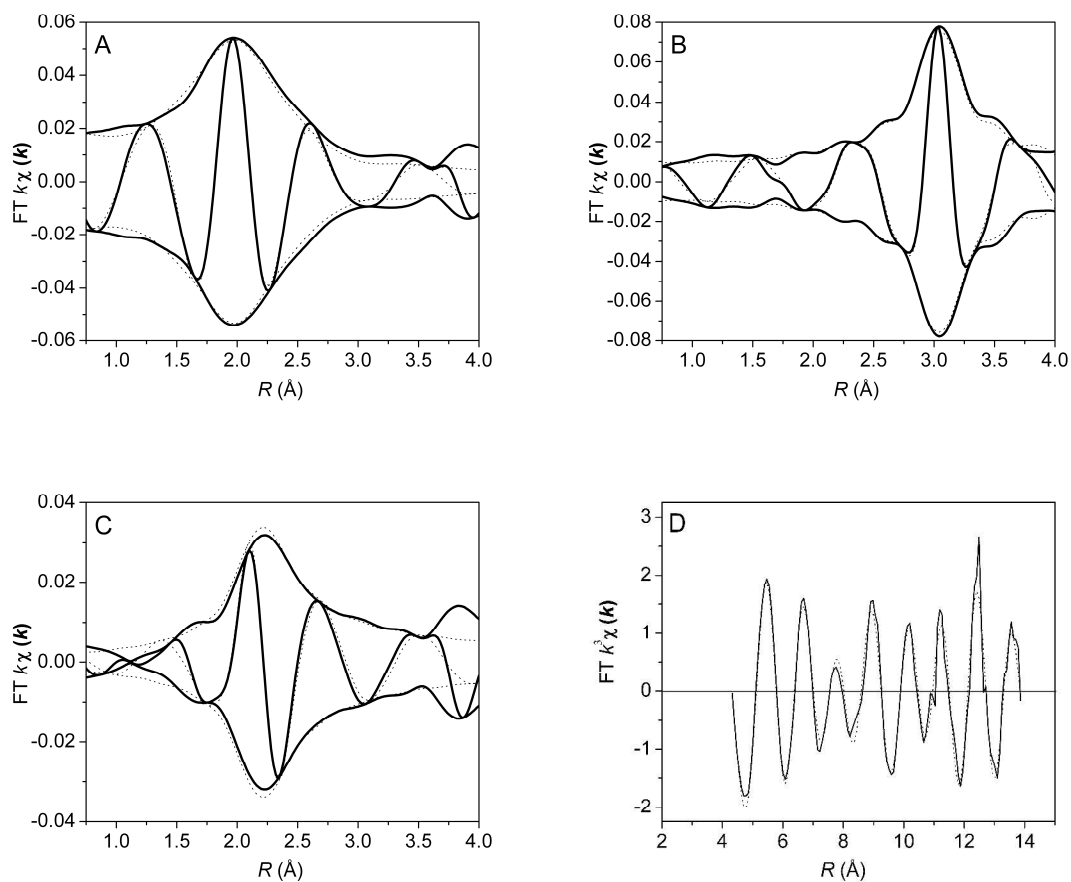

**Figure SI 4:** EXAFS data (Model IV) characterizing species formed by reductive carbonylation of  $\text{Os}_3(\text{CO})_{12}$  on MgO at 548 K: (A)  $k^1$ -weighted, phase corrected, imaginary part and magnitude of the Fourier transform of data (solid line) and calculated contributions (dotted line) of Os–C shell; (B)  $k^1$ -weighted, phase corrected, imaginary part and magnitude of the Fourier transform of data (solid line) and calculated contributions (dotted line) of Os–O\* shell; (C)  $k^1$ -weighted, phase corrected, imaginary part and magnitude of the Fourier transform of data (solid line) and calculated contributions (dotted line) of Os–O<sub>support</sub> shell; (D)  $k^3$ -weighted EXAFS function,  $k^3(\chi)$  (solid line) and sum of the calculated contributions (dotted line).

**Example of EXAFS Data Fitting.** Described below, as an example, is the detailed analysis carried out for the data characterizing the sample formed by reductive carbonylation of  $\text{Os}_3(\text{CO})_{12}$  on MgO at 548 K.

The initial data fitting with the plausible absorber–backscatterer contributions (Os–Os, Os–C, Os–Mg, Os–O<sub>support</sub> and Os–O\*, O\* and C represent the carbon and oxygen atoms from a carbonyl ligand) led to a narrowed list of to candidate fits (models I and II) on the basis of the goodness of fit. No fit including only a single shell (contribution) was adequate. Both the models found to be most successful in fitting the data included Os–Os contributions. Model I includes two Os–Os contributions, at 2.80 and 2.98 Å, with coordination number of 2.3 and 2.4, respectively, whereas model II included only one contribution, at 2.89 Å, with a coordination number of 4.5. Model I and II each includes contributions from carbonyl ligands, namely, Os–C and Os–O\*. All contributions were fitted with reference files that best represent the contributions in the measured sample.

Model I provides the best overall fit, and model II provides a good overall fit as well; however, the shell characterizing the Os–Mg contribution in model II was found not to fit well after the contribution was phase- and amplitude-corrected, showing unrealistic values for  $\Delta E_0$  ( $18.99 \pm 8.97$  eV). Furthermore, the Debye-Waller factors for the Os–Mg

contribution was  $< 0$ , and these values are unrealistic. Of the two models, model I is the one that fits the data better with physically realistic parameters.
